# Supplementary material for: Successive constructions of regular tetra-, hexa- and octanuclear microporous polyoxovanadates(iii) for gas adsorption
Source: Royal Society of Chemistry journal article supplement (doi:10.1039/d2dt01360f), 2022-01-01
Supplement: d2dt01360f1.pdf [file d2dt01360f1.pdf]

## Supporting information

### Successive constructions of regular tetra-, hexa- and octanuclear microporous polyoxovanadates(III) for gas adsorptions

Zhen-Lang Xie, Dong-Li An, Wei-Zheng Weng, Zhao-Hui Zhou\*

*State Key Laboratory of Physical Chemistry of Solid Surfaces and Department of Chemistry, College of Chemistry and Chemical Engineering, Xiamen University, Xiamen, 361005, China, Tel: + 86-592-2184531; Fax: + 86-592-2183047  
zhzhou@xmu.edu.cn*

#### Figures and Table Options

|                                                                                                                                                                                                                                                                                                                                                                                                                                                                                                                                                                                                                                                                 |    |
|-----------------------------------------------------------------------------------------------------------------------------------------------------------------------------------------------------------------------------------------------------------------------------------------------------------------------------------------------------------------------------------------------------------------------------------------------------------------------------------------------------------------------------------------------------------------------------------------------------------------------------------------------------------------|----|
| Figure S1. Ball-and-stick models of polyanionic cluster $[V_4(\mu_2\text{-OH})_4(\text{ox})_4(\text{pz})_4]^{4-}$ ( <b>1</b> ). .....                                                                                                                                                                                                                                                                                                                                                                                                                                                                                                                           | 3  |
| Figure S2. (a) "Violet" and (b) "yellow": cosine-like "V–O–S–O–V–O" rings of <b>4</b> . (c): sinusoid-like "V–N–N–V" ring. ....                                                                                                                                                                                                                                                                                                                                                                                                                                                                                                                                 | 4  |
| Figure S3. 2D packing diagram of <b>1</b> observed along the <i>c</i> axis. ....                                                                                                                                                                                                                                                                                                                                                                                                                                                                                                                                                                                | 5  |
| Figure S4. Channels in <b>4</b> viewed along <i>b</i> axis. ....                                                                                                                                                                                                                                                                                                                                                                                                                                                                                                                                                                                                | 6  |
| Figure S5. Fourier transform infrared (FT-IR) spectra of $(\text{NH}_4)_2\text{K}_2[V_4(\mu_2\text{-OH})_4(\text{ox})_4(\text{pz})_4]\cdot 9\text{H}_2\text{O}$ ( <b>1</b> ), $(\text{NH}_4)_2\text{Na}_2[V_4(\mu_2\text{-OH})_4(\text{ox})_4(4\text{-mpz})_4]\cdot 7\text{H}_2\text{O}$ ( <b>2</b> ), $\text{K}_2[V_6(\mu_2\text{-OH})_6(\text{ox})_6(\text{Hdatrz})_6]\text{Cl}_2\cdot 29.5\text{H}_2\text{O}$ ( <b>3</b> ) and $[V_8(\mu_2\text{-OH})_8(\text{SO}_3)_8(\text{Hdatrz})_8]\cdot 38\text{H}_2\text{O}$ ( <b>4</b> ). ....                                                                                                                       | 7  |
| Figure S6. Solid-state UV-vis spectra of $(\text{NH}_4)_2\text{K}_2[V_4(\mu_2\text{-OH})_4(\text{ox})_4(\text{pz})_4]\cdot 9\text{H}_2\text{O}$ ( <b>1</b> ), $(\text{NH}_4)_2\text{Na}_2[V_4(\mu_2\text{-OH})_4(\text{ox})_4(4\text{-mpz})_4]\cdot 7\text{H}_2\text{O}$ ( <b>2</b> ), $\text{K}_2[V_6(\mu_2\text{-OH})_6(\text{ox})_6(\text{Hdatrz})_6]\text{Cl}_2\cdot 29.5\text{H}_2\text{O}$ ( <b>3</b> ) and $[V_8(\mu_2\text{-OH})_8(\text{SO}_3)_8(\text{Hdatrz})_8]\cdot 38\text{H}_2\text{O}$ ( <b>4</b> ). ....                                                                                                                                       | 8  |
| Figure S7. TGA curves of solid samples $(\text{NH}_4)_2\text{K}_2[V_4(\mu_2\text{-OH})_4(\text{ox})_4(\text{pz})_4]\cdot 9\text{H}_2\text{O}$ ( <b>1</b> , a), $(\text{NH}_4)_2\text{Na}_2[V_4(\mu_2\text{-OH})_4(\text{ox})_4(4\text{-mpz})_4]\cdot 7\text{H}_2\text{O}$ ( <b>2</b> , b), $\text{K}_2[V_6(\mu_2\text{-OH})_6(\text{ox})_6(\text{Hdatrz})_6]\text{Cl}_2\cdot 29.5\text{H}_2\text{O}$ ( <b>3</b> , c) and $[V_8(\mu_2\text{-OH})_8(\text{SO}_3)_8(\text{Hdatrz})_8]\cdot 38\text{H}_2\text{O}$ ( <b>4</b> , d). ....                                                                                                                             | 9  |
| Figure S8. Temperature dependence of magnetic susceptibilities of $(\text{NH}_4)_2\text{K}_2[V_4(\mu_2\text{-OH})_4(\text{ox})_4(\text{pz})_4]\cdot 9\text{H}_2\text{O}$ ( <b>1</b> , a), $(\text{NH}_4)_2\text{Na}_2[V_4(\mu_2\text{-OH})_4(\text{ox})_4(4\text{-mpz})_4]\cdot 7\text{H}_2\text{O}$ ( <b>2</b> , b), $\text{K}_2[V_6(\mu_2\text{-OH})_6(\text{ox})_6(\text{Hdatrz})_6]\text{Cl}_2\cdot 29.5\text{H}_2\text{O}$ ( <b>3</b> , c) and $[V_8(\mu_2\text{-OH})_8(\text{SO}_3)_8(\text{Hdatrz})_8]\cdot 38\text{H}_2\text{O}$ ( <b>4</b> , d) under 0.1 T applied field between 300 and 2 K. Blue lines correspond to the best fitting results. .... | 10 |
| Figure S9. $\text{N}_2$ adsorption-desorption isotherms of $(\text{NH}_4)_2\text{K}_2[V_4(\mu_2\text{-OH})_4(\text{ox})_4(\text{pz})_4]\cdot 9\text{H}_2\text{O}$ ( <b>1</b> ), $(\text{NH}_4)_2\text{Na}_2[V_4(\mu_2\text{-OH})_4(\text{ox})_4(4\text{-mpz})_4]\cdot 7\text{H}_2\text{O}$ ( <b>2</b> ) and $[V_8(\mu_2\text{-OH})_8(\text{SO}_3)_8(\text{Hdatrz})_8]\cdot 38\text{H}_2\text{O}$ ( <b>4</b> ) at 77K. ....                                                                                                                                                                                                                                      | 11 |

|                                                                                                                                                                                                                                                                                                                                                                                                                                                                                                                                                                                                                                                                                                                                                                                                                     |    |
|---------------------------------------------------------------------------------------------------------------------------------------------------------------------------------------------------------------------------------------------------------------------------------------------------------------------------------------------------------------------------------------------------------------------------------------------------------------------------------------------------------------------------------------------------------------------------------------------------------------------------------------------------------------------------------------------------------------------------------------------------------------------------------------------------------------------|----|
| Figure S10. (a) CO <sub>2</sub> adsorption isotherms for <b>1</b> , <b>2</b> and <b>4</b> at 288 K; (b) Isostatic heat of adsorption ( $Q_{st}$ ) plotted against CO <sub>2</sub> uptake for <b>1</b> , <b>2</b> and <b>4</b> .....                                                                                                                                                                                                                                                                                                                                                                                                                                                                                                                                                                                 | 12 |
| Figure S11. IAST selectivity of equimolar CO <sub>2</sub> /CH <sub>4</sub> = 0.5/0.5 mixture for <b>4</b> . .....                                                                                                                                                                                                                                                                                                                                                                                                                                                                                                                                                                                                                                                                                                   | 13 |
| Figure S12. Comparison of the observed PXRD (red) with the simulated patterns (black) calculated from the SXRD data for (NH <sub>4</sub> ) <sub>2</sub> K <sub>2</sub> [V <sub>4</sub> (μ <sub>2</sub> -OH) <sub>4</sub> (ox) <sub>4</sub> (pz) <sub>4</sub> ]·9H <sub>2</sub> O ( <b>1</b> , a), (NH <sub>4</sub> ) <sub>2</sub> Na <sub>2</sub> [V <sub>4</sub> (μ <sub>2</sub> -OH) <sub>4</sub> (ox) <sub>4</sub> (4-mpz) <sub>4</sub> ]·7H <sub>2</sub> O ( <b>2</b> , b), K <sub>2</sub> [V <sub>6</sub> (μ <sub>2</sub> -OH) <sub>6</sub> (ox) <sub>6</sub> (Hdatrz) <sub>6</sub> ]Cl <sub>2</sub> ·29.5H <sub>2</sub> O ( <b>3</b> , c) and [V <sub>8</sub> (μ <sub>2</sub> -OH) <sub>8</sub> (SO <sub>3</sub> ) <sub>8</sub> (Hdatrz) <sub>8</sub> ]·38H <sub>2</sub> O ( <b>4</b> , d), respectively..... | 14 |
| Table S1. Crystallographic data and structural refinement details for (NH <sub>4</sub> ) <sub>2</sub> K <sub>2</sub> [V <sub>4</sub> (μ <sub>2</sub> -OH) <sub>4</sub> (ox) <sub>4</sub> (pz) <sub>4</sub> ]·9H <sub>2</sub> O ( <b>1</b> ), (NH <sub>4</sub> ) <sub>2</sub> Na <sub>2</sub> [V <sub>4</sub> (μ <sub>2</sub> -OH) <sub>4</sub> (ox) <sub>4</sub> (4-mpz) <sub>4</sub> ]·7H <sub>2</sub> O ( <b>2</b> ), K <sub>2</sub> [V <sub>6</sub> (μ <sub>2</sub> -OH) <sub>6</sub> (ox) <sub>6</sub> (Hdatrz) <sub>6</sub> ]Cl <sub>2</sub> ·29.5H <sub>2</sub> O ( <b>3</b> ) and [V <sub>8</sub> (μ <sub>2</sub> -OH) <sub>8</sub> (SO <sub>3</sub> ) <sub>8</sub> (Hdatrz) <sub>8</sub> ]·38H <sub>2</sub> O ( <b>4</b> ), respectively.....                                                               | 15 |
| Table S2. Selected bond distances (Å) and angles (°) for (NH <sub>4</sub> ) <sub>2</sub> K <sub>2</sub> [V <sub>4</sub> (μ <sub>2</sub> -OH) <sub>4</sub> (ox) <sub>4</sub> (pz) <sub>4</sub> ]·9H <sub>2</sub> O ( <b>1</b> ), (NH <sub>4</sub> ) <sub>2</sub> Na <sub>2</sub> [V <sub>4</sub> (μ <sub>2</sub> -OH) <sub>4</sub> (ox) <sub>4</sub> (4-mpz) <sub>4</sub> ]·7H <sub>2</sub> O ( <b>2</b> ), K <sub>2</sub> [V <sub>6</sub> (μ <sub>2</sub> -OH) <sub>6</sub> (ox) <sub>6</sub> (Hdatrz) <sub>6</sub> ]Cl <sub>2</sub> ·29.5H <sub>2</sub> O ( <b>3</b> ) and [V <sub>8</sub> (μ <sub>2</sub> -OH) <sub>8</sub> (SO <sub>3</sub> ) <sub>8</sub> (Hdatrz) <sub>8</sub> ]·38H <sub>2</sub> O ( <b>4</b> ), respectively.....                                                                            | 17 |
| Table S3. Hydrogen bonds observed in (NH <sub>4</sub> ) <sub>2</sub> K <sub>2</sub> [V <sub>4</sub> (μ <sub>2</sub> -OH) <sub>4</sub> (ox) <sub>4</sub> (pz) <sub>4</sub> ]·9H <sub>2</sub> O ( <b>1</b> ), (NH <sub>4</sub> ) <sub>2</sub> Na <sub>2</sub> [V <sub>4</sub> (μ <sub>2</sub> -OH) <sub>4</sub> (ox) <sub>4</sub> (4-mpz) <sub>4</sub> ]·7H <sub>2</sub> O ( <b>2</b> ), K <sub>2</sub> [V <sub>6</sub> (μ <sub>2</sub> -OH) <sub>6</sub> (ox) <sub>6</sub> (Hdatrz) <sub>6</sub> ]Cl <sub>2</sub> ·29.5H <sub>2</sub> O ( <b>3</b> ) and [V <sub>8</sub> (μ <sub>2</sub> -OH) <sub>8</sub> (SO <sub>3</sub> ) <sub>8</sub> (Hdatrz) <sub>8</sub> ]·38H <sub>2</sub> O ( <b>4</b> ).....                                                                                                              | 20 |
| Table S4. Comparisons of V–O distances (Å) in <b>1</b> ~ <b>4</b> and a series of tetra-, hexa- and octanuclear vanadium(III/IV/V) clusters with bridging μ <sub>2</sub> -hydroxy/μ <sub>2</sub> -oxygen groups. ....                                                                                                                                                                                                                                                                                                                                                                                                                                                                                                                                                                                               | 22 |
| Table S5. Bond valence sum calculations for (NH <sub>4</sub> ) <sub>2</sub> K <sub>2</sub> [V <sub>4</sub> (μ <sub>2</sub> -OH) <sub>4</sub> (ox) <sub>4</sub> (pz) <sub>4</sub> ]·9H <sub>2</sub> O ( <b>1</b> ), (NH <sub>4</sub> ) <sub>2</sub> Na <sub>2</sub> [V <sub>4</sub> (μ <sub>2</sub> -OH) <sub>4</sub> (ox) <sub>4</sub> (4-mpz) <sub>4</sub> ]·7H <sub>2</sub> O ( <b>2</b> ), K <sub>2</sub> [V <sub>6</sub> (μ <sub>2</sub> -OH) <sub>6</sub> (ox) <sub>6</sub> (Hdatrz) <sub>6</sub> ]Cl <sub>2</sub> ·29.5H <sub>2</sub> O ( <b>3</b> ) and [V <sub>8</sub> (μ <sub>2</sub> -OH) <sub>8</sub> (SO <sub>3</sub> ) <sub>8</sub> (Hdatrz) <sub>8</sub> ]·38H <sub>2</sub> O ( <b>4</b> ), respectively.....                                                                                         | 24 |
| Table S6. Comparisons of CO <sub>2</sub> adsorption data for <b>1</b> , <b>2</b> and <b>4</b> with other porous polyoxometalates at 298 K. ....                                                                                                                                                                                                                                                                                                                                                                                                                                                                                                                                                                                                                                                                     | 25 |
| Table S7. V–μ <sub>2</sub> -O distances (Å) for (NH <sub>4</sub> ) <sub>2</sub> K <sub>2</sub> [V <sub>4</sub> (μ <sub>2</sub> -OH) <sub>4</sub> (ox) <sub>4</sub> (pz) <sub>4</sub> ]·9H <sub>2</sub> O ( <b>1</b> ), (NH <sub>4</sub> ) <sub>2</sub> Na <sub>2</sub> [V <sub>4</sub> (μ <sub>2</sub> -OH) <sub>4</sub> (ox) <sub>4</sub> (4-mpz) <sub>4</sub> ]·7H <sub>2</sub> O ( <b>2</b> ) and [V <sub>8</sub> (μ <sub>2</sub> -OH) <sub>8</sub> (SO <sub>3</sub> ) <sub>8</sub> (Hdatrz) <sub>8</sub> ]·38H <sub>2</sub> O ( <b>4</b> ) before and after O <sub>2</sub> adsorption.....                                                                                                                                                                                                                      | 26 |

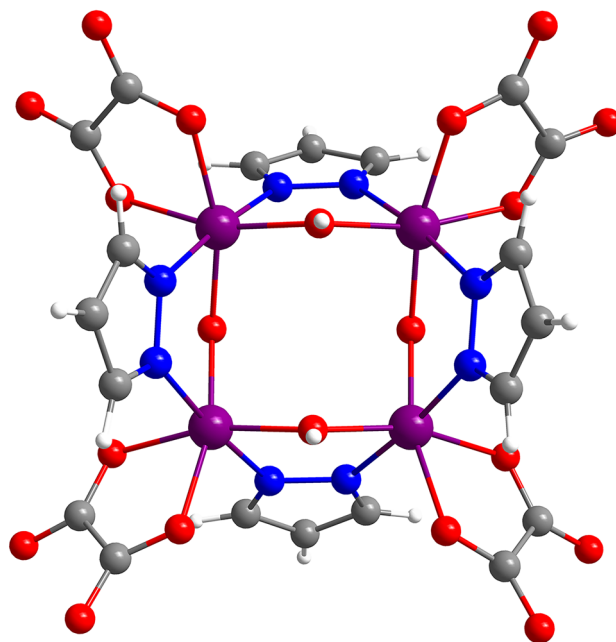

Figure S1. Ball-and-stick models of polyanionic cluster  $[V_4(\mu_2\text{-OH})_4(\text{ox})_4(\text{pz})_4]^{4-}$  (**1**).

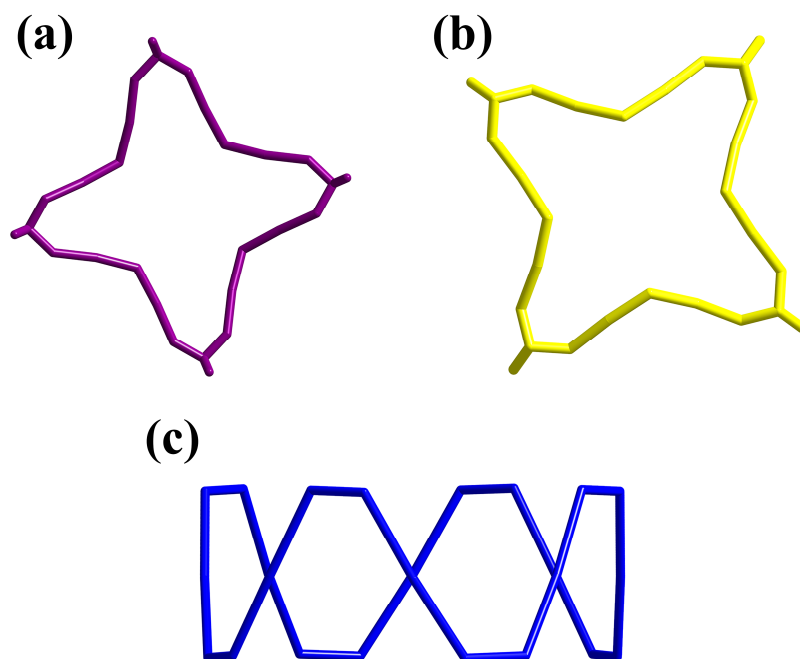

Figure S2. (a) "Violet" and (b) "yellow": cosine-like "V-O-S-O-V-O" rings of 4. (c): sinusoid-like "V-N-N-V" ring.

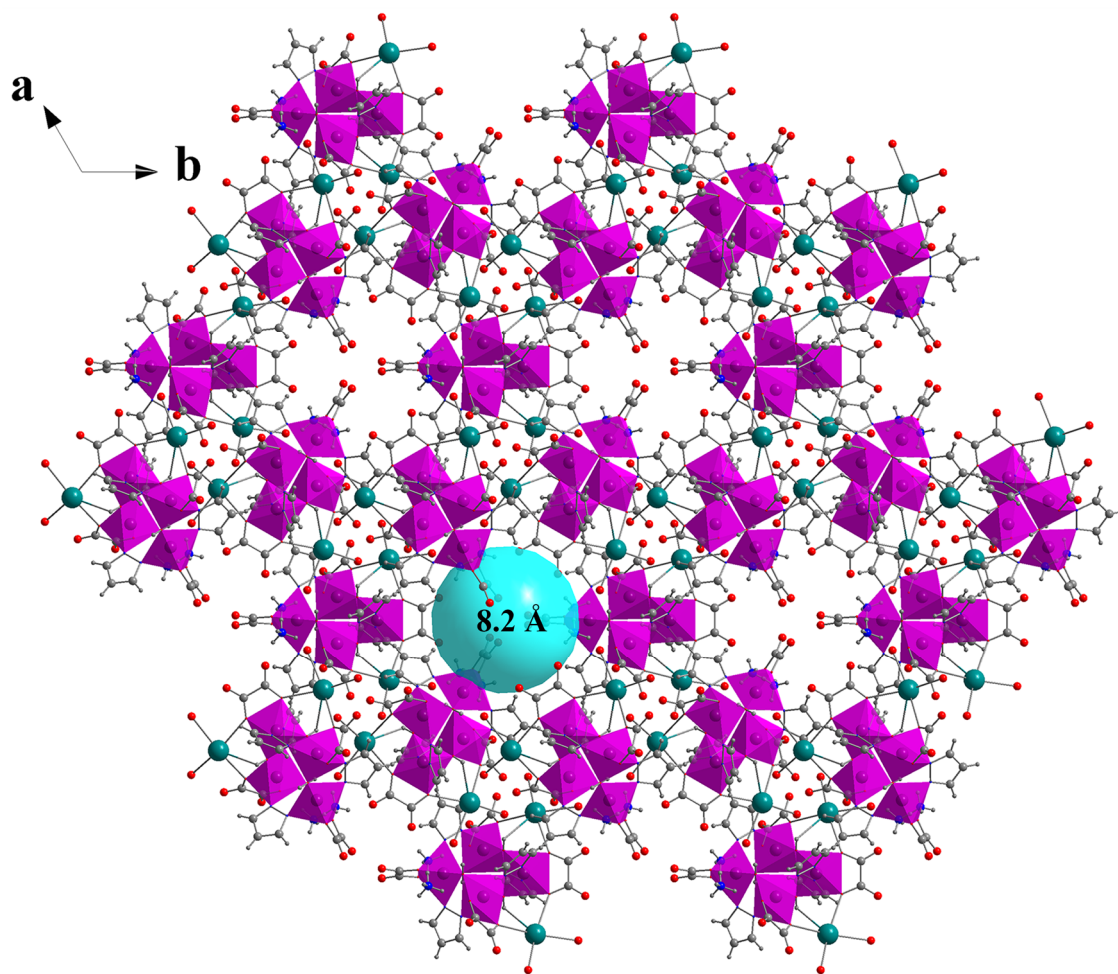

Figure S3. 2D packing diagram of **1** observed along the *c* axis.

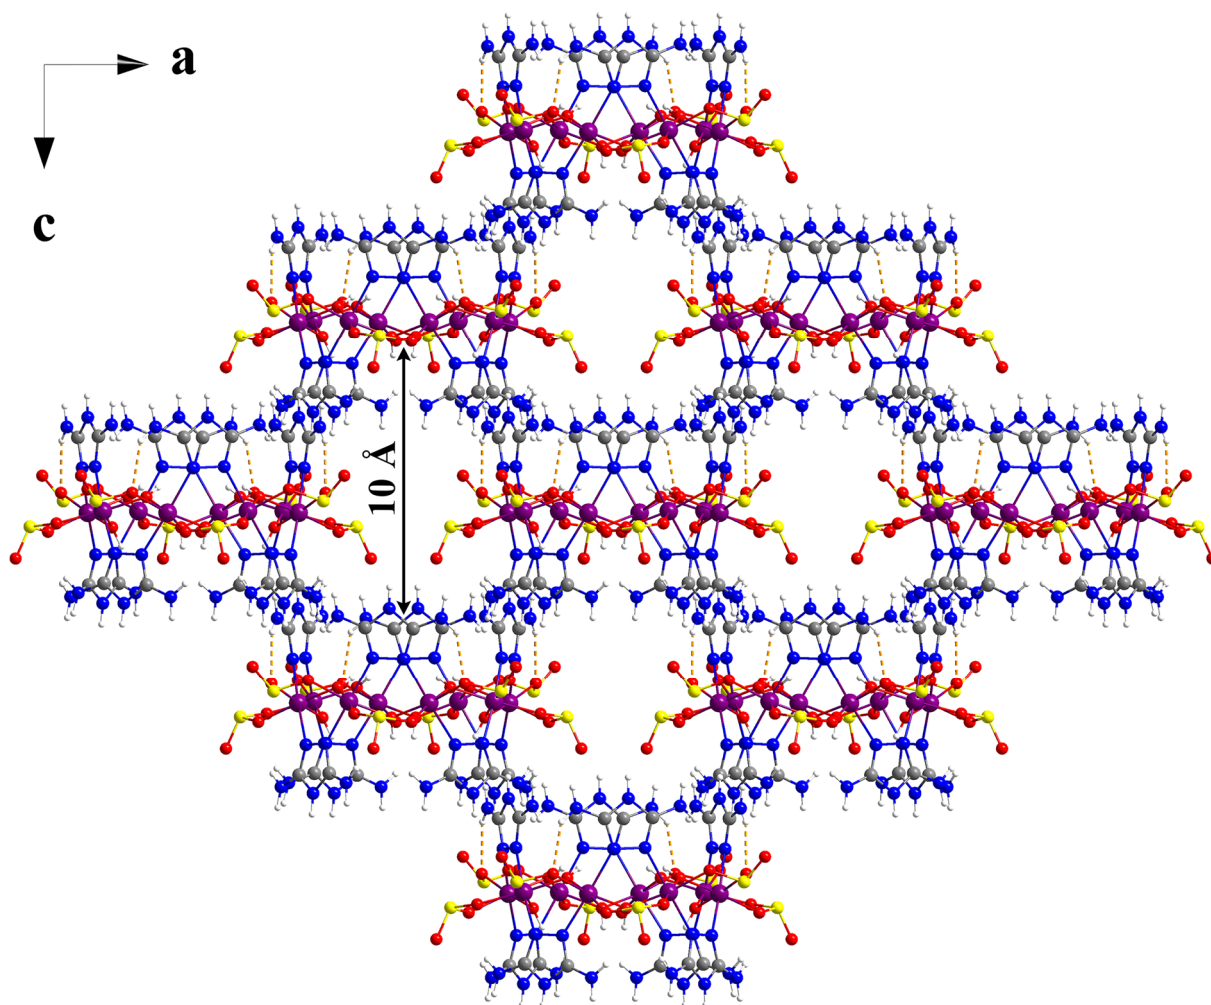

Figure S4. Channels in **4** viewed along  $b$  axis.

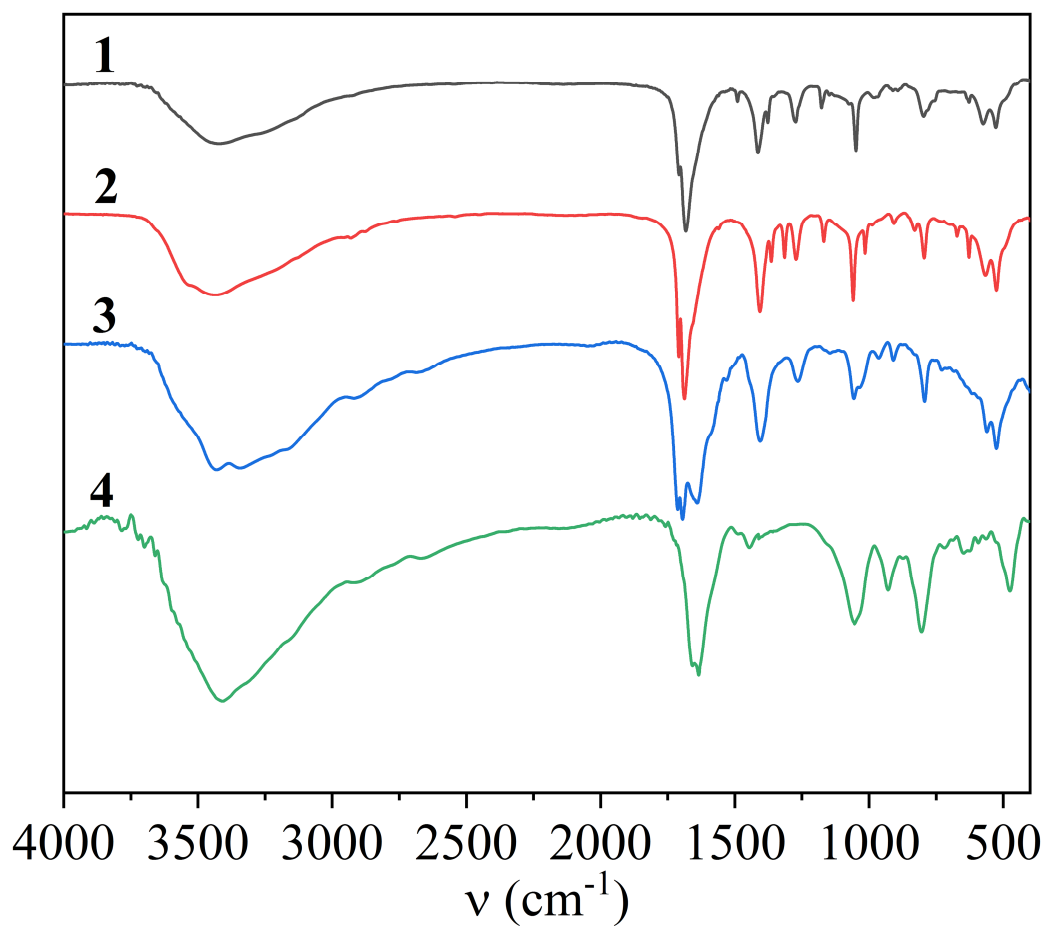

Figure S5. Fourier transform infrared (FT-IR) spectra of  $(\text{NH}_4)_2\text{K}_2[\text{V}_4(\mu_2\text{-OH})_4(\text{ox})_4(\text{pz})_4]\cdot 9\text{H}_2\text{O}$  (**1**),  $(\text{NH}_4)_2\text{Na}_2[\text{V}_4(\mu_2\text{-OH})_4(\text{ox})_4(4\text{-mpz})_4]\cdot 7\text{H}_2\text{O}$  (**2**),  $\text{K}_2[\text{V}_6(\mu_2\text{-OH})_6(\text{ox})_6(\text{Hdatrz})_6]\text{Cl}_2\cdot 29.5\text{H}_2\text{O}$  (**3**) and  $[\text{V}_8(\mu_2\text{-OH})_8(\text{SO}_3)_8(\text{Hdatrz})_8]\cdot 38\text{H}_2\text{O}$  (**4**).

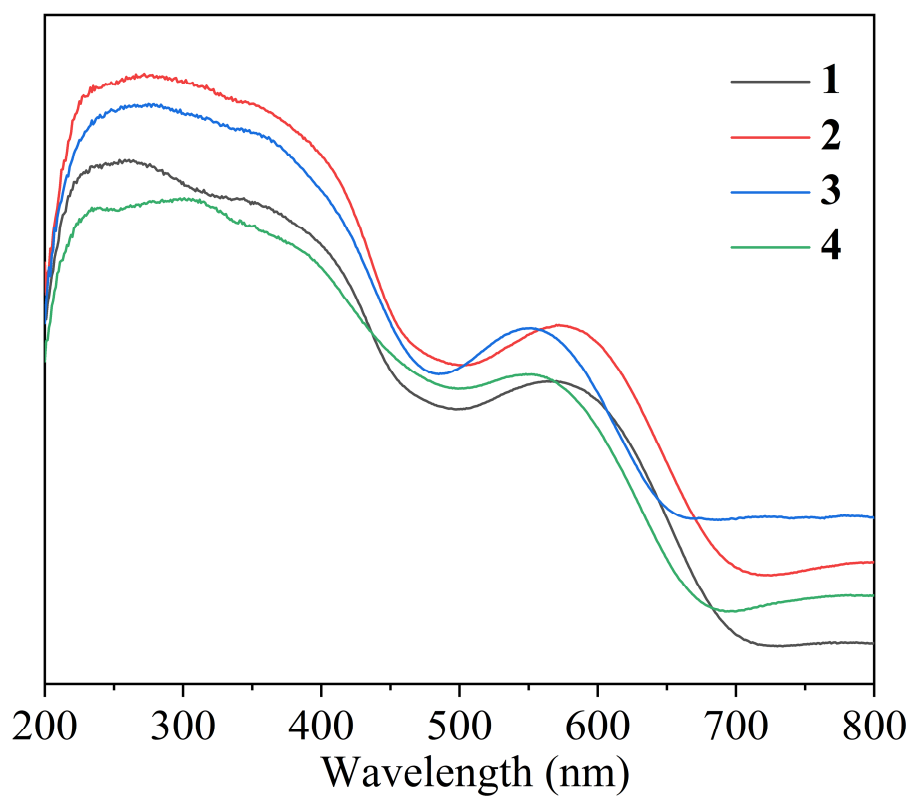

Figure S6. Solid-state UV-vis spectra of  $(\text{NH}_4)_2\text{K}_2[\text{V}_4(\mu_2\text{-OH})_4(\text{ox})_4(\text{pz})_4]\cdot 9\text{H}_2\text{O}$  (**1**),  $(\text{NH}_4)_2\text{Na}_2[\text{V}_4(\mu_2\text{-OH})_4(\text{ox})_4(4\text{-mpz})_4]\cdot 7\text{H}_2\text{O}$  (**2**),  $\text{K}_2[\text{V}_6(\mu_2\text{-OH})_6(\text{ox})_6(\text{Hdatrz})_6]\text{Cl}_2\cdot 29.5\text{H}_2\text{O}$  (**3**) and  $[\text{V}_8(\mu_2\text{-OH})_8(\text{SO}_3)_8(\text{Hdatrz})_8]\cdot 38\text{H}_2\text{O}$  (**4**).



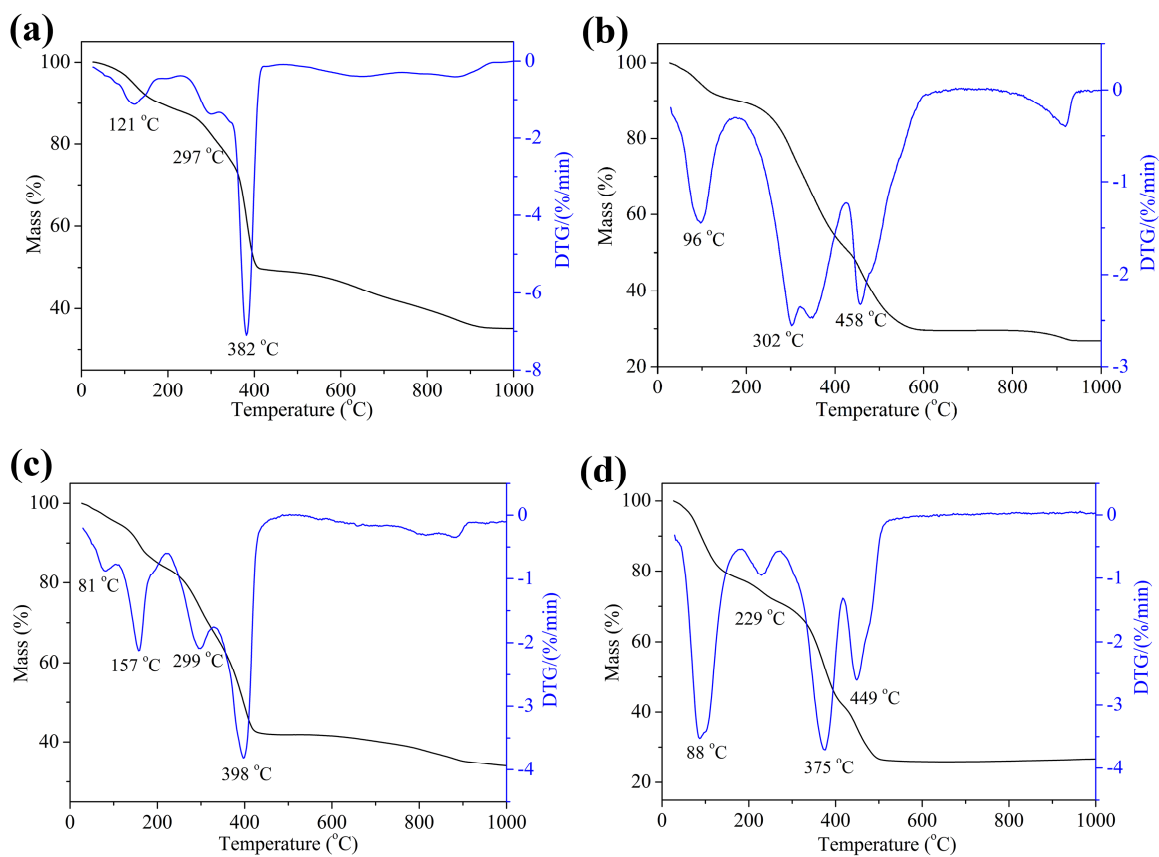

Figure S7. TGA curves of solid samples  $(\text{NH}_4)_2\text{K}_2[\text{V}_4(\mu_2\text{-OH})_4(\text{ox})_4(\text{pz})_4]\cdot 9\text{H}_2\text{O}$  (**1**, a),  $(\text{NH}_4)_2\text{Na}_2[\text{V}_4(\mu_2\text{-OH})_4(\text{ox})_4(4\text{-mpz})_4]\cdot 7\text{H}_2\text{O}$  (**2**, b),  $\text{K}_2[\text{V}_6(\mu_2\text{-OH})_6(\text{ox})_6(\text{Hdatrz})_6]\text{Cl}_2\cdot 29.5\text{H}_2\text{O}$  (**3**, c) and  $[\text{V}_8(\mu_2\text{-OH})_8(\text{SO}_3)_8(\text{Hdatrz})_8]\cdot 38\text{H}_2\text{O}$  (**4**, d).

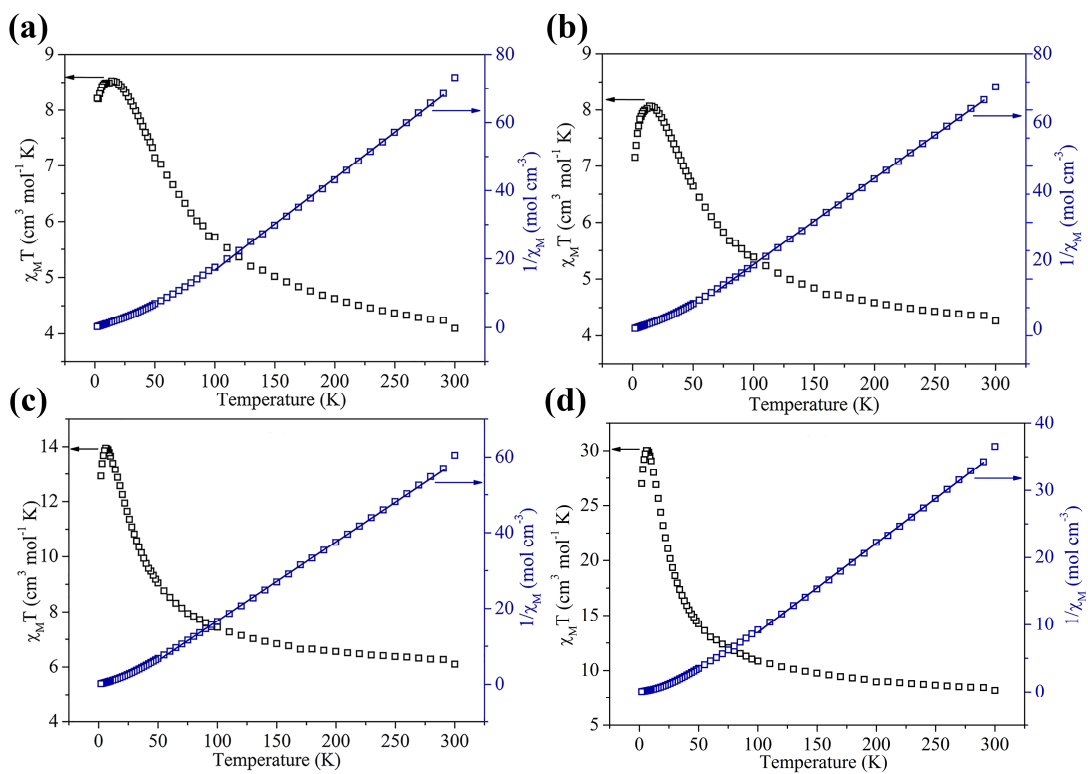

Figure S8. Temperature dependence of magnetic susceptibilities of  $(\text{NH}_4)_2\text{K}_2[\text{V}_4(\mu_2\text{-OH})_4(\text{ox})_4(\text{pz})_4]\cdot 9\text{H}_2\text{O}$  (**1**, a),  $(\text{NH}_4)_2\text{Na}_2[\text{V}_4(\mu_2\text{-OH})_4(\text{ox})_4(4\text{-mpz})_4]\cdot 7\text{H}_2\text{O}$  (**2**, b),  $\text{K}_2[\text{V}_6(\mu_2\text{-OH})_6(\text{ox})_6(\text{Hdatrz})_6]\text{Cl}_2\cdot 29.5\text{H}_2\text{O}$  (**3**, c) and  $[\text{V}_8(\mu_2\text{-OH})_8(\text{SO}_3)_8(\text{Hdatrz})_8]\cdot 38\text{H}_2\text{O}$  (**4**, d) under 0.1 T applied field between 300 and 2 K. Blue lines correspond to the best fitting results.

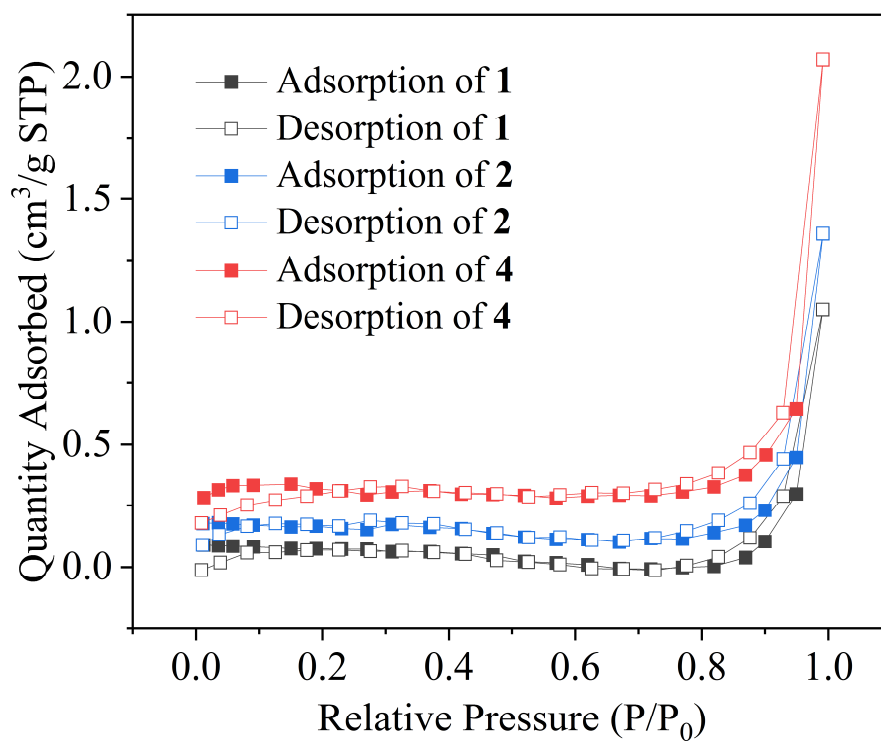

Figure S9. N<sub>2</sub> adsorption-desorption isotherms of (NH<sub>4</sub>)<sub>2</sub>K<sub>2</sub>[V<sub>4</sub>(μ<sub>2</sub>-OH)<sub>4</sub>(ox)<sub>4</sub>(pz)<sub>4</sub>]·9H<sub>2</sub>O (**1**), (NH<sub>4</sub>)<sub>2</sub>Na<sub>2</sub>[V<sub>4</sub>(μ<sub>2</sub>-OH)<sub>4</sub>(ox)<sub>4</sub>(4-mpz)<sub>4</sub>]·7H<sub>2</sub>O (**2**) and [V<sub>8</sub>(μ<sub>2</sub>-OH)<sub>8</sub>(SO<sub>3</sub>)<sub>8</sub>(Hdatz)<sub>8</sub>]·38H<sub>2</sub>O (**4**) at 77K.

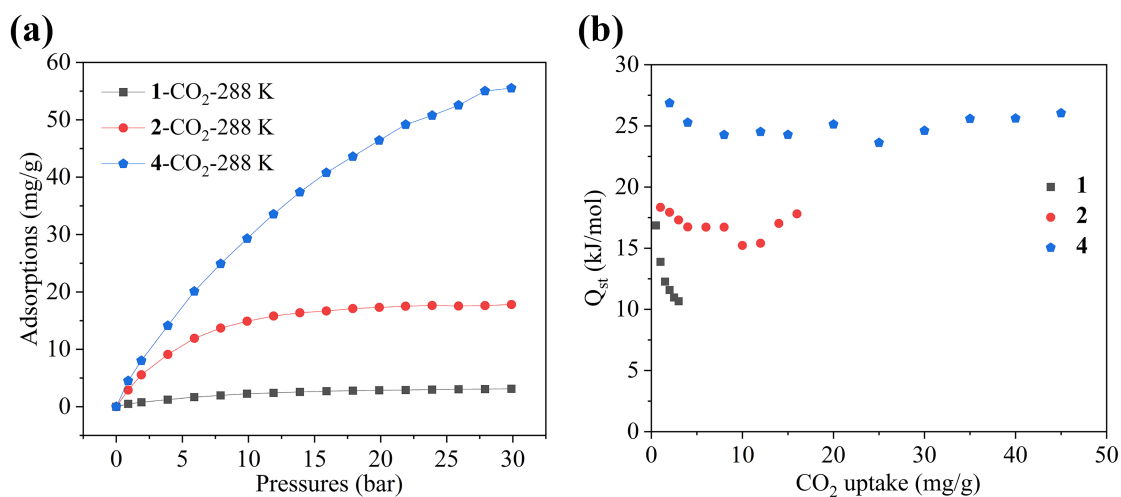

Figure S10. (a) CO<sub>2</sub> adsorption isotherms for **1**, **2** and **4** at 288 K; (b) Isosteric heat of adsorption ( $Q_{st}$ ) plotted against CO<sub>2</sub> uptake for **1**, **2** and **4**.

**Isosteric heat of adsorption was calculated using Clausius–Clapeyron equation:**

$$Q_{st} = RT_1T_2 \ln(P_2/P_1)/(T_2 - T_1);$$

$$R = 8.314 \times 10^{-3} \text{ kJ}/(\text{mol} \cdot \text{K}^{-1}), T_1 = 288 \text{ K}, T_2 = 298 \text{ K}.$$

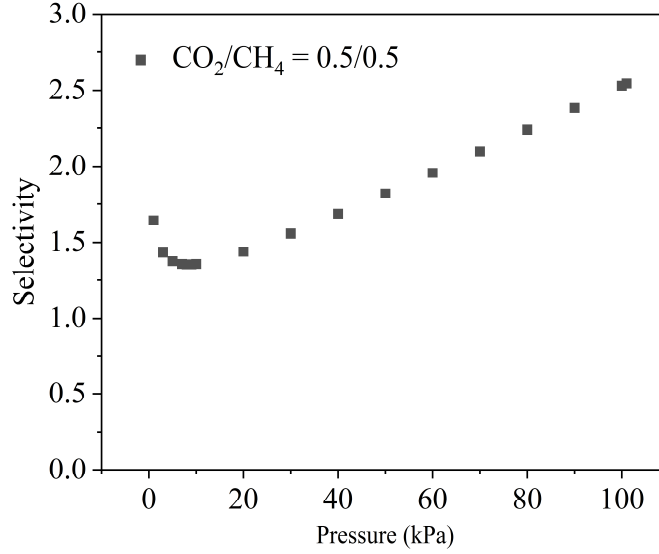

Figure S11. IAST selectivity of equimolar CO<sub>2</sub>/CH<sub>4</sub> = 0.5/0.5 mixture for **4**.

#### Calculation of CO<sub>2</sub>/CH<sub>4</sub> selectivity

The ideal adsorbed solution theory (IAST) developed by Myers and Praunitz was used to quantify the CO<sub>2</sub>/CH<sub>4</sub> (50/50) selectivities for **4**. Pure component isotherm of CO<sub>2</sub> and CH<sub>4</sub> at 298 K were fitted to the single-site Langmuir-Freundlich (LF) model:

$$N = a \times \frac{bp^c}{1 + bp^c}$$

where  $a$  represents the saturation adsorption capacities;  $b$  is the affinity constants;  $p$  is the pressure of the bulk gas at equilibrium with the adsorbed phase;  $c$  is the deviations from an ideal homogeneous surface. The fitting parameters of LF equation as well as the correlation coefficients ( $R^2$ ) were listed below:

| Adsorbates      | $a$  | $b$     | $c$     | $R^2$  |
|-----------------|------|---------|---------|--------|
| CO <sub>2</sub> | 3.13 | 0.02678 | 0.87785 | 0.9995 |
| CH <sub>4</sub> | 1.04 | 0.06081 | 1.04342 | 0.9990 |

The adsorption selectivity is defined as

$$S = \frac{x_1 / x_2}{y_1 / y_2}$$

where  $x$  is the molar fraction in the adsorbed phase and  $y$  is the molar fraction in the gas phase.

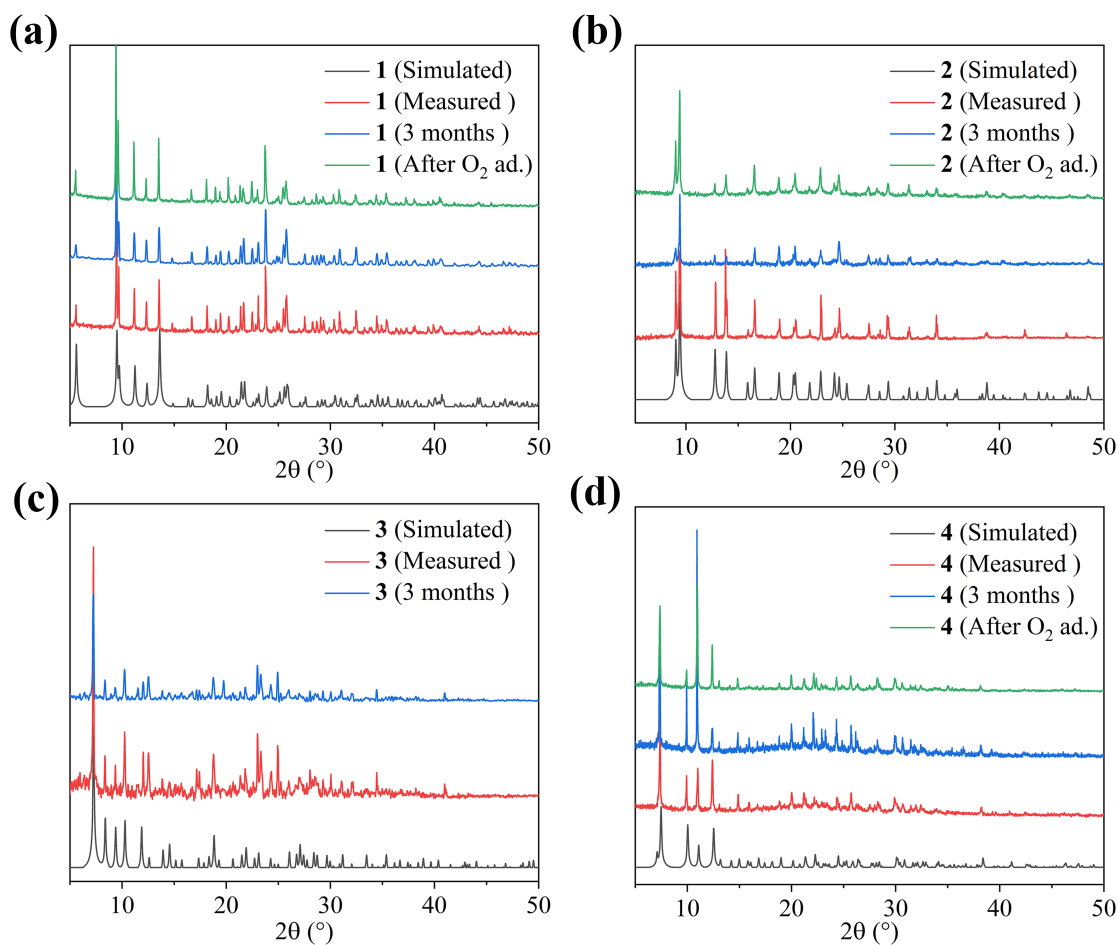

Figure S12. Comparison of the observed PXRD (red) with the simulated patterns (black) calculated from the SXRD data for  $(\text{NH}_4)_2\text{K}_2[\text{V}_4(\mu_2\text{-OH})_4(\text{ox})_4(\text{pz})_4]\cdot 9\text{H}_2\text{O}$  (**1**, a),  $(\text{NH}_4)_2\text{Na}_2[\text{V}_4(\mu_2\text{-OH})_4(\text{ox})_4(4\text{-mpz})_4]\cdot 7\text{H}_2\text{O}$  (**2**, b),  $\text{K}_2[\text{V}_6(\mu_2\text{-OH})_6(\text{ox})_6(\text{Hdatrz})_6]\text{Cl}_2\cdot 29.5\text{H}_2\text{O}$  (**3**, c) and  $[\text{V}_8(\mu_2\text{-OH})_8(\text{SO}_3)_8(\text{Hdatrz})_8]\cdot 38\text{H}_2\text{O}$  (**4**, d), respectively.

Table S1. Crystallographic data and structural refinement details for  $(\text{NH}_4)_2\text{K}_2[\text{V}_4(\mu_2\text{-OH})_4(\text{ox})_4(\text{pz})_4]\cdot 9\text{H}_2\text{O}$  (**1**),  $(\text{NH}_4)_2\text{Na}_2[\text{V}_4(\mu_2\text{-OH})_4(\text{ox})_4(4\text{-mpz})_4]\cdot 7\text{H}_2\text{O}$  (**2**),  $\text{K}_2[\text{V}_6(\mu_2\text{-OH})_6(\text{ox})_6(\text{Hdatrz})_6]\text{Cl}_2\cdot 29.5\text{H}_2\text{O}$  (**3**) and  $[\text{V}_8(\mu_2\text{-OH})_8(\text{SO}_3)_8(\text{Hdatrz})_8]\cdot 38\text{H}_2\text{O}$  (**4**), respectively.

|                                  | <b>1</b>                                                                   | <b>2</b>                                                                    | <b>3</b>                                                                                  | <b>4</b>                                                                    |
|----------------------------------|----------------------------------------------------------------------------|-----------------------------------------------------------------------------|-------------------------------------------------------------------------------------------|-----------------------------------------------------------------------------|
| Empirical formula                | $\text{C}_{20}\text{H}_{34}\text{K}_2\text{N}_{10}\text{O}_{29}\text{V}_4$ | $\text{C}_{24}\text{H}_{40}\text{N}_{10}\text{Na}_2\text{O}_{27}\text{V}_4$ | $\text{C}_{24}\text{Cl}_2\text{H}_{88.5}\text{K}_2\text{N}_{30}\text{O}_{59.5}\text{V}_6$ | $\text{C}_{16}\text{H}_{124}\text{N}_{40}\text{O}_{70}\text{S}_8\text{V}_8$ |
| Formula weight                   | 1160.53                                                                    | 1150.40                                                                     | 2204.48                                                                                   | 2661.54                                                                     |
| Temperature/K                    | 100(1)                                                                     | 100(1)                                                                      | 100(1)                                                                                    | 100(1)                                                                      |
| Crystal system                   | Trigonal                                                                   | Orthorhombic                                                                | Cubic                                                                                     | Tetragonal                                                                  |
| Space group                      | $P\ 3_221$                                                                 | $C\ 222_1$                                                                  | $P\ a-3$                                                                                  | $P\ 4nc$                                                                    |
| $a/\text{\AA}$                   | 18.1163(1)                                                                 | 12.6075(5)                                                                  | 21.0340(1)                                                                                | 17.5495(8)                                                                  |
| $b/\text{\AA}$                   | 18.1163(1)                                                                 | 19.6716(6)                                                                  | 21.0340(1)                                                                                | 17.5495(8)                                                                  |
| $c/\text{\AA}$                   | 11.4282(6)                                                                 | 19.2268(6)                                                                  | 21.0340(1)                                                                                | 15.9061(1)                                                                  |
| $\alpha/^\circ$                  | 90                                                                         | 90                                                                          | 90                                                                                        | 90                                                                          |
| $\beta/^\circ$                   | 90                                                                         | 90                                                                          | 90                                                                                        | 90                                                                          |
| $\gamma/^\circ$                  | 120                                                                        | 90                                                                          | 90                                                                                        | 90                                                                          |
| Volume/ $\text{\AA}^3$           | 3248.24(4)                                                                 | 4768.40(3)                                                                  | 9306.06(1)                                                                                | 4898.84(6)                                                                  |
| $Z$                              | 3                                                                          | 4                                                                           | 4                                                                                         | 2                                                                           |
| $\rho_{\text{calc}}/\text{cm}^3$ | 1.780                                                                      | 1.602                                                                       | 1.573                                                                                     | 1.804                                                                       |
| $\mu/\text{mm}^{-1}$             | 9.713                                                                      | 7.416                                                                       | 7.211                                                                                     | 8.879                                                                       |
| $F(000)$                         | 1758.0                                                                     | 2336.0                                                                      | 4514.0                                                                                    | 2774.0                                                                      |
| Crystal size/ $\text{mm}^3$      | $0.10 \times 0.05 \times 0.05$                                             | $0.10 \times 0.05 \times 0.05$                                              | $0.1 \times 0.1 \times 0.05$                                                              | $0.1 \times 0.05 \times 0.05$                                               |

| Radiation                                        | Cu K $\alpha$ ( $\lambda = 1.54184$ ) | Cu K $\alpha$ ( $\lambda = 1.54184$ ) | Cu K $\alpha$ ( $\lambda = 1.54184$ ) | Cu K $\alpha$ ( $\lambda = 1.54184$ ) |
|--------------------------------------------------|---------------------------------------|---------------------------------------|---------------------------------------|---------------------------------------|
| 2 $\theta$ range for data collection/ $^{\circ}$ | 5.632 to 153.962                      | 8.330 to 133.978                      | 7.280 to 153.388                      | 7.124 to 154.232                      |
| Reflections collected                            | 48980                                 | 9530                                  | 12070                                 | 69024                                 |
| Independent reflections                          | 4498                                  | 4005                                  | 3071                                  | 5037                                  |
| $R_{\text{int}}$                                 | 0.0454                                | 0.0542                                | 0.0259                                | 0.0379                                |
| Data/restraints/parameters                       | 4498/2/263                            | 4005/12/291                           | 3071/1/166                            | 5037/6/244                            |
| Goodness of fit on $F^2$                         | 1.040                                 | 1.042                                 | 1.069                                 | 1.039                                 |
| Final $R$ indexes [ $I \geq 2\sigma(I)$ ]        | $R_1 = 0.0472$ , $wR_2 = 0.1253$      | $R_1 = 0.0736$ , $wR_2 = 0.2013$      | $R_1 = 0.0524$ , $wR_2 = 0.1577$      | $R_1 = 0.0477$ , $wR_2 = 0.1279$      |
| Final $R$ indexes [all data]                     | $R_1 = 0.0477$ , $wR_2 = 0.1258$      | $R_1 = 0.0787$ , $wR_2 = 0.2087$      | $R_1 = 0.0545$ , $wR_2 = 0.1597$      | $R_1 = 0.0487$ , $wR_2 = 0.1292$      |
| Largest diff. peak and hole / $e\text{\AA}^{-3}$ | 1.33/-1.07                            | 1.72/-0.50                            | 0.99/-0.32                            | 0.42/-0.58                            |



Table S2. Selected bond distances (Å) and angles (°) for (NH<sub>4</sub>)<sub>2</sub>K<sub>2</sub>[V<sub>4</sub>(μ<sub>2</sub>-OH)<sub>4</sub>(ox)<sub>4</sub>(pz)<sub>4</sub>]·9H<sub>2</sub>O (1), (NH<sub>4</sub>)<sub>2</sub>Na<sub>2</sub>[V<sub>4</sub>(μ<sub>2</sub>-OH)<sub>4</sub>(ox)<sub>4</sub>(4-mpz)<sub>4</sub>]·7H<sub>2</sub>O (2), K<sub>2</sub>[V<sub>6</sub>(μ<sub>2</sub>-OH)<sub>6</sub>(ox)<sub>6</sub>(Hdatrz)<sub>6</sub>]Cl<sub>2</sub>·29.5H<sub>2</sub>O (3) and [V<sub>8</sub>(μ<sub>2</sub>-OH)<sub>8</sub>(SO<sub>3</sub>)<sub>8</sub>(Hdatrz)<sub>8</sub>]·38H<sub>2</sub>O (4), respectively.

| <b>1</b>                            |           |                                     |           |
|-------------------------------------|-----------|-------------------------------------|-----------|
| V1–O5                               | 1.948(4)  | V3–O9                               | 2.041(4)  |
| V1–O6                               | 1.934(4)  | V3–N2 <sup>a</sup>                  | 2.081(4)  |
| V1–O1                               | 2.049(4)  | V3–N2                               | 2.081(4)  |
| V1–O2                               | 2.043(4)  | V2–O6 <sup>a</sup>                  | 1.945(4)  |
| V1–N3                               | 2.105(4)  | V2–O6                               | 1.946(4)  |
| V1–N1                               | 2.085(5)  | V2–O7 <sup>a</sup>                  | 2.041(7)  |
| V3–O5 <sup>a</sup>                  | 1.947(4)  | V2–O7                               | 2.041(7)  |
| V3–O5                               | 1.947(4)  | V2–N4                               | 2.097(5)  |
| V3–O9 <sup>a</sup>                  | 2.041(4)  | V2–N4 <sup>a</sup>                  | 2.097(5)  |
|                                     |           |                                     |           |
| O5–V1–O1                            | 88.46(2)  | O6 <sup>a</sup> –V2–O6              | 103.3(2)  |
| O5–V1–O2                            | 163.16(2) | O6–V2–O7                            | 89.5(3)   |
| O5–V1–N3                            | 92.64(2)  | O6–V2–O7 <sup>a</sup>               | 165.5(3)  |
| O5–V1–N1                            | 84.53(2)  | O6 <sup>a</sup> –V2–O7              | 165.5(3)  |
| O6–V1–O5                            | 105.36(2) | O7 <sup>a</sup> –V2–N4 <sup>a</sup> | 95.6(3)   |
| O6–V1–O1                            | 164.04(2) | O7–V2–N4 <sup>a</sup>               | 88.4(3)   |
| O6–V1–O2                            | 90.14(2)  | O7 <sup>a</sup> –V2–N4              | 88.4(3)   |
| O6–V1–N3                            | 84.21(2)  | O7–V2–N4                            | 95.6(3)   |
| O6–V1–N1                            | 91.85(2)  | N4–V2–N4 <sup>a</sup>               | 174.9(3)  |
| O1–V1–N3                            | 87.28(2)  | O5–V3–O9                            | 91.34(2)  |
| O1–V1–N1                            | 97.47(2)  | O5 <sup>a</sup> –V3–O9 <sup>a</sup> | 91.34(2)  |
| O2–V1–O1                            | 77.24(2)  | O5–V3–O9 <sup>a</sup>               | 167.24(2) |
| O2–V1–N3                            | 95.48(2)  | O5–V3–N2 <sup>a</sup>               | 90.99(2)  |
| O2–V1–N1                            | 88.52(2)  | O5–V3–N2                            | 84.78(2)  |
| N1–V1–N3                            | 174.38(2) | O5 <sup>a</sup> –V3–N2              | 91.00(2)  |
| O5 <sup>a</sup> –V3–O5              | 100.3(2)  | O5 <sup>a</sup> –V3–N2 <sup>a</sup> | 84.78(2)  |
| O5–V3–O9 <sup>a</sup>               | 167.24(2) | O9 <sup>a</sup> –V3–O9              | 77.6(2)   |
| O6 <sup>a</sup> –V2–O7 <sup>a</sup> | 89.5(3)   | O9–V3–N2                            | 95.33(2)  |
| O6–V2–N4                            | 84.23(2)  | O9 <sup>a</sup> –V3–N2              | 89.81(2)  |
| O6–V2–N4 <sup>a</sup>               | 92.59(2)  | O9–V3–N2 <sup>a</sup>               | 89.81(2)  |
| O6 <sup>a</sup> –V2–N4 <sup>a</sup> | 84.23(2)  | O9 <sup>a</sup> –V3–N2 <sup>a</sup> | 95.33(2)  |
| O6 <sup>a</sup> –V2–N4              | 92.59(2)  | N2 <sup>a</sup> –V3–N2              | 173.4(3)  |
| O7–V2–O7 <sup>a</sup>               | 78.8(6)   |                                     |           |

Symmetric codes: (a)  $-y + x$ ,  $-y$ ,  $4/3 - z$

**2**

|                     |          |        |          |
|---------------------|----------|--------|----------|
| V1-O10 <sup>a</sup> | 1.953(6) | V2-O10 | 1.955(6) |
| V1-O5               | 1.931(6) | V2-O5  | 1.955(6) |
| V1-O2               | 2.036(6) | V2-O7  | 2.026(6) |
| V1-O1               | 2.048(7) | V2-O6  | 2.061(6) |
| V1-N4 <sup>a</sup>  | 2.094(7) | V2-N1  | 2.100(7) |
| V1-N2               | 2.096(7) | V2-N3  | 2.099(7) |

|                                      |          |           |          |
|--------------------------------------|----------|-----------|----------|
| O10 <sup>a</sup> -V1-O2              | 166.7(3) | O10-V2-O7 | 89.8(3)  |
| O10 <sup>a</sup> -V1-O1              | 91.4(3)  | O10-V2-O6 | 165.0(3) |
| O10 <sup>a</sup> -V1-N4 <sup>a</sup> | 85.3(3)  | O10-V2-N1 | 92.0(3)  |
| O10 <sup>a</sup> -V1-N2              | 91.2(3)  | O10-V2-N3 | 85.1(3)  |
| O5-V1-O10 <sup>a</sup>               | 101.6(3) | O5-V2-O10 | 102.0(3) |
| O5-V1-O2                             | 90.5(3)  | O5-V2-O7  | 166.5(3) |
| O5-V1-O1                             | 165.5(3) | O5-V2-O6  | 91.7(3)  |
| O5-V1-N4 <sup>a</sup>                | 93.0(3)  | O5-V2-N1  | 84.6(3)  |
| O5-V1-N2                             | 85.0(3)  | O5-V2-N3  | 92.1(3)  |
| O2-V1-O1                             | 77.2(3)  | O7-V2-O6  | 77.4(3)  |
| O2-V1-N4 <sup>a</sup>                | 88.7(3)  | O7-V2-N1  | 88.5(3)  |
| O2-V1-N2                             | 95.30(3) | O7-V2-N3  | 95.6(3)  |
| O1-V1-N4 <sup>a</sup>                | 94.4(3)  | O6-V2-N1  | 95.4(3)  |
| O1-V1-N2                             | 88.4(3)  | O6-V2-N3  | 88.3(3)  |
| N4 <sup>a</sup> -V1-N2               | 175.6(3) | N3-V2-N1  | 175.0(3) |

Symmetric codes: (a)  $x$ ,  $1 - y$ ,  $1 - z$

**3**

|                                     |           |                        |           |
|-------------------------------------|-----------|------------------------|-----------|
| V1-O5                               | 1.934(2)  | V1-O1                  | 2.032(2)  |
| V1-O5 <sup>a</sup>                  | 1.938(2)  | V1-N2 <sup>a</sup>     | 2.096(2)  |
| V1-O2                               | 2.038(2)  | V1-N1                  | 2.098(2)  |
| O5-V1-O5 <sup>a</sup>               | 99.66(1)  | O5 <sup>a</sup> -V1-N1 | 89.29(9)  |
| O5 <sup>a</sup> -V1-O2              | 167.91(8) | O2-V1-N2 <sup>a</sup>  | 90.78(9)  |
| O5-V1-O2                            | 92.28(8)  | O2-V1-N1               | 93.23(9)  |
| O5-V1-O1                            | 170.18(8) | O1-V1-O2               | 78.26(9)  |
| O5 <sup>a</sup> -V1-O1              | 89.90(8)  | O1-V1-N2 <sup>a</sup>  | 92.84(1)  |
| O5 <sup>a</sup> -V1-N2 <sup>a</sup> | 87.35(9)  | O1-V1-N1               | 90.69(9)  |
| O5-V1-N2 <sup>a</sup>               | 89.87(9)  | N2 <sup>a</sup> -V1-N1 | 175.12(1) |
| O5-V1-N1                            | 87.20(9)  |                        |           |

Symmetric codes: (a)  $\frac{1}{2} - y$ ,  $-\frac{1}{2} + z$ ,  $x$

**4**

|       |          |                    |          |
|-------|----------|--------------------|----------|
| V1-O1 | 1.944(4) | V2-O1 <sup>a</sup> | 1.963(4) |
| V1-O2 | 1.969(4) | V2-O2              | 1.983(4) |
| V1-O3 | 2.033(4) | V2-O6              | 1.986(4) |

|                        |           |                                     |           |
|------------------------|-----------|-------------------------------------|-----------|
| V1-N1                  | 2.056(5)  | V2-O4                               | 2.030(4)  |
| V1-O8 <sup>b</sup>     | 2.012(4)  | V2-N7 <sup>a</sup>                  | 2.159(5)  |
| V1-N6                  | 2.123(5)  | V2-N2                               | 2.071(5)  |
| O1-V1-O2               | 97.84(2)  | O1 <sup>a</sup> -V2-O2              | 91.93(2)  |
| O1-V1-O3               | 170.21(2) | O1 <sup>a</sup> -V2-O6              | 90.47(2)  |
| O1-V1-N1               | 94.61(2)  | O1 <sup>a</sup> -V2-O4              | 172.59(2) |
| O1-V1-O8 <sup>b</sup>  | 90.10(2)  | O1 <sup>a</sup> -V2-N7 <sup>a</sup> | 86.47(2)  |
| O1-V1-N6               | 84.55(2)  | O1 <sup>a</sup> -V2-N2              | 94.32(2)  |
| O2-V1-O3               | 87.81(2)  | O2-V2-O6                            | 174.50(2) |
| O2-V1-N1               | 86.29(2)  | O2-V2-O4                            | 89.98(2)  |
| O2-V1-O8 <sup>b</sup>  | 172.05(2) | O2-V2-N7 <sup>a</sup>               | 90.95(2)  |
| O2-V1-N6               | 89.40(2)  | O2-V2-N2                            | 85.21(2)  |
| O3-V1-N1               | 93.70(2)  | O6-V2-O4                            | 88.26(2)  |
| O3-V1-N6               | 87.50(2)  | O6-V2-N7 <sup>a</sup>               | 94.1(2)   |
| N1-V1-N6               | 175.40(2) | O6-V2-N2                            | 89.7(2)   |
| O8 <sup>b</sup> -V1-O3 | 84.34(2)  | O4-V2-N7 <sup>a</sup>               | 86.35(2)  |
| O8 <sup>b</sup> -V1-N1 | 93.00(2)  | O4-V2-N2                            | 92.96(2)  |
| O8 <sup>b</sup> -V1-N6 | 91.50(2)  | N2-V2-N7 <sup>a</sup>               | 176.10(2) |

Symmetric codes: (a)  $1 - y, x, z$ ; (b)  $y, 1-x, z$

---

Table S3. Hydrogen bonds observed in  $(\text{NH}_4)_2\text{K}_2[\text{V}_4(\mu_2\text{-OH})_4(\text{ox})_4(\text{pz})_4]\cdot 9\text{H}_2\text{O}$  (**1**),  $(\text{NH}_4)_2\text{Na}_2[\text{V}_4(\mu_2\text{-OH})_4(\text{ox})_4(4\text{-mpz})_4]\cdot 7\text{H}_2\text{O}$  (**2**),  $\text{K}_2[\text{V}_6(\mu_2\text{-OH})_6(\text{ox})_6(\text{Hdatrz})_6]\text{Cl}_2\cdot 29.5\text{H}_2\text{O}$  (**3**) and  $[\text{V}_8(\mu_2\text{-OH})_8(\text{SO}_3)_8(\text{Hdatrz})_8]\cdot 38\text{H}_2\text{O}$  (**4**).

| D–H⋯A                                                                     | D–H (Å) | H⋯A (Å) | D⋯A (Å)  | D–H⋯A(°) |
|---------------------------------------------------------------------------|---------|---------|----------|----------|
| <b>1</b>                                                                  |         |         |          |          |
| O5–H5⋯O2w <sup>a</sup>                                                    | 0.86    | 1.85    | 2.710(6) | 176      |
| N5–H5B⋯O7                                                                 | 0.91    | 2.25    | 2.095(1) | 122      |
| N5–H5D⋯O2                                                                 | 0.91    | 1.83    | 2.738(1) | 179      |
| O6–H6⋯O1w <sup>b</sup>                                                    | 0.83    | 1.97    | 2.773(6) | 164      |
| Symmetric codes: (a) $1 - x + y, 1 - x, 1/3 + z$ ; (b) $y, -1 + x, 1 - z$ |         |         |          |          |
| <b>2</b>                                                                  |         |         |          |          |
| O5–H5⋯N5                                                                  | 0.85(2) | 1.87(2) | 2.710(1) | 170(2)   |
| N5–H5A⋯O8 <sup>a</sup>                                                    | 0.91    | 2.03    | 2.889(2) | 156      |
| N5–H5B⋯O3 <sup>b</sup>                                                    | 0.91    | 2.42    | 3.206(2) | 145      |
| O10–H10⋯O1w                                                               | 0.84(4) | 1.88(4) | 2.689(2) | 161(6)   |
| Symmetric codes: (a) $-x, y, 1/2 - z$ ; (b) $-1/2 + x, 1/2 - y, 1 - z$    |         |         |          |          |
| <b>3</b>                                                                  |         |         |          |          |
| N3–H3⋯O3 <sup>a</sup>                                                     | 0.88    | 2.18    | 2.824(4) | 129      |
| N3–H3⋯O4 <sup>a</sup>                                                     | 0.88    | 2.14    | 2.880(4) | 141      |
| N4–H4A⋯O1                                                                 | 0.88    | 2.22    | 2.946(4) | 140      |
| N4–H4B⋯O3 <sup>a</sup>                                                    | 0.88    | 2.34    | 2.985(4) | 130      |
| O5–H5⋯Cl1                                                                 | 0.85(3) | 2.31(4) | 3.150(2) | 169(4)   |

|                          |      |      |          |     |
|--------------------------|------|------|----------|-----|
| N5–H5A···O2              | 0.88 | 2.32 | 3.022(4) | 137 |
| N5–H5B···O4 <sup>a</sup> | 0.88 | 2.37 | 3.089(4) | 140 |

Symmetric codes: (a)  $1 - y, 1 - z, 1 - x$

#### 4

|                            |      |      |          |     |
|----------------------------|------|------|----------|-----|
| N3–H3···O5 <sup>a</sup>    | 0.88 | 1.85 | 2.694(7) | 160 |
| N4–H4A···O7 <sup>b</sup>   | 0.88 | 2.39 | 3.192(9) | 152 |
| N4–H4A···O8 <sup>b</sup>   | 0.88 | 2.34 | 3.048(9) | 137 |
| N5–H5B···O6                | 0.89 | 2.12 | 2.938(8) | 152 |
| N9–H9A···O3                | 0.88 | 2.57 | 3.119(9) | 121 |
| N10–H10A···O4 <sup>b</sup> | 0.88 | 2.19 | 2.919(8) | 140 |

Symmetric codes: (a)  $-\frac{1}{2} + y, \frac{1}{2} + x, \frac{1}{2} + z$ ; (b)  $y, 1 - x, z$

---

Table S4. Comparisons of V–O distances (Å) in **1** ~ **4** and a series of tetra-, hexa- and octanuclear vanadium(III/IV/V) clusters with bridging  $\mu_2$ -hydroxy/ $\mu_2$ -oxygen groups.

| Complexes                                                                                                                                                                                                     | V– $\mu_2$ -OH | V– $\mu_2$ -O |
|---------------------------------------------------------------------------------------------------------------------------------------------------------------------------------------------------------------|----------------|---------------|
| <b>{V<sup>V</sup><sub>4</sub>O<sub>12</sub>}</b>                                                                                                                                                              |                |               |
| [Co <sub>2</sub> (phen) <sub>4</sub> V <sub>4</sub> O <sub>12</sub> ] C <sub>6</sub> H <sub>11</sub> OH·H <sub>2</sub> O <sup>1</sup>                                                                         |                | 1.791(3)      |
| [Mn <sub>2</sub> (phen) <sub>4</sub> V <sub>4</sub> O <sub>12</sub> ] C <sub>6</sub> H <sub>11</sub> OH·H <sub>2</sub> O <sup>1</sup>                                                                         |                | 1.788(4)      |
| [Ni <sub>2</sub> (phen) <sub>4</sub> V <sub>4</sub> O <sub>12</sub> ] C <sub>6</sub> H <sub>11</sub> OH·H <sub>2</sub> O <sup>1</sup>                                                                         |                | 1.794(4)      |
| [{Ni(quarterpy)(H <sub>2</sub> O)} <sub>2</sub> V <sub>4</sub> O <sub>12</sub> ] 10H <sub>2</sub> O <sup>2</sup>                                                                                              |                | 1.778(4)      |
| Average                                                                                                                                                                                                       |                | 1.788(4)      |
| <b>{V<sup>V</sup><sub>4</sub>O<sub>8</sub>}</b>                                                                                                                                                               |                |               |
| Na <sub>4</sub> [V <sub>4</sub> O <sub>8</sub> ( <i>rac</i> -tart) <sub>2</sub> ] 12H <sub>2</sub> O <sup>3</sup>                                                                                             |                | 1.826(2)      |
| (NEt <sub>4</sub> ) <sub>4</sub> [V <sub>4</sub> O <sub>8</sub> (( <i>R,R</i> )-tart) <sub>2</sub> ] 6H <sub>2</sub> O <sup>3</sup>                                                                           |                | 1.832(2)      |
| (C <sub>24</sub> H <sub>20</sub> P)[V <sub>4</sub> O <sub>8</sub> (C <sub>2</sub> H <sub>3</sub> O <sub>2</sub> ) <sub>4</sub> (NO <sub>3</sub> ) <sub>4</sub> ] <sup>4</sup>                                 |                | 1.811(2)      |
| Average                                                                                                                                                                                                       |                | 1.823(2)      |
| <b>{V<sup>V</sup><sub>6</sub>O<sub>13</sub>}</b>                                                                                                                                                              |                |               |
| (Bu <sub>4</sub> N) <sub>2</sub> [V <sub>6</sub> O <sub>13</sub> {(OCH <sub>2</sub> ) <sub>3</sub> CCH <sub>2</sub> OOCC <sub>6</sub> H <sub>4</sub> Br- <i>p</i> } <sub>2</sub> ] <sup>5</sup>               |                | 1.835(3)      |
| (Bu <sub>4</sub> N) <sub>2</sub> [V <sub>6</sub> O <sub>13</sub> {(OCH <sub>2</sub> ) <sub>3</sub> CCH <sub>2</sub> OOCC <sub>6</sub> H <sub>4</sub> NO <sub>2</sub> - <i>m</i> } <sub>2</sub> ] <sup>5</sup> |                | 1.841(5)      |
| (Bu <sub>4</sub> N) <sub>2</sub> [V <sub>6</sub> O <sub>13</sub> {(OCH <sub>2</sub> ) <sub>3</sub> CCH <sub>2</sub> OOCC <sub>4</sub> H <sub>3</sub> S} <sub>2</sub> ] <sup>5</sup>                           |                | 1.843(2)      |
| Average                                                                                                                                                                                                       |                | 1.840(5)      |
| <b>{V<sup>IV</sup><sub>4</sub>O<sub>4</sub>}</b>                                                                                                                                                              |                |               |
| [Cp*VCl( $\mu$ -O)] <sub>4</sub> <sup>6</sup>                                                                                                                                                                 |                | 1.800(2)      |
| <b>{V<sup>III</sup><sub>4</sub>(OH)<sub>4</sub>}</b>                                                                                                                                                          |                |               |
| (NH <sub>4</sub> ) <sub>2</sub> K <sub>2</sub> [V <sub>4</sub> ( $\mu_2$ -OH) <sub>4</sub> (ox) <sub>4</sub> (pz) <sub>4</sub> ]·9H <sub>2</sub> O ( <b>1</b> )                                               | 1.942(5)       |               |
| (NH <sub>4</sub> ) <sub>2</sub> Na <sub>2</sub> [V <sub>4</sub> ( $\mu_2$ -OH) <sub>4</sub> (ox) <sub>4</sub> (4-mpz) <sub>4</sub> ]·7H <sub>2</sub> O ( <b>2</b> )                                           | 1.939(5)       |               |
| [V <sub>4</sub> ( $\mu$ -OOCCH <sub>3</sub> ) <sub>4</sub> ( $\mu$ -OH) <sub>4</sub> (OH <sub>2</sub> ) <sub>8</sub> ]Cl <sub>4</sub> ·3H <sub>2</sub> O <sup>7</sup>                                         | 1.939(1)       |               |
| [V <sub>4</sub> ( $\mu$ -OH) <sub>4</sub> ( $\mu$ -OOCF <sub>3</sub> ) <sub>4</sub> (OH <sub>2</sub> ) <sub>8</sub> ]Cl <sub>4</sub> ·7.5H <sub>2</sub> O <sup>8</sup>                                        | 1.939(3)       |               |
| [V <sub>4</sub> ( $\mu$ -OH) <sub>4</sub> ( $\mu$ -OOCCH <sub>3</sub> ) <sub>4</sub> (OH <sub>2</sub> ) <sub>8</sub> ]Cl <sub>4</sub> ·CH <sub>3</sub> COOH·12H <sub>2</sub> O <sup>8</sup>                   | 1.939(1)       |               |
| [V <sub>4</sub> ( $\mu$ -OH) <sub>4</sub> ( $\mu$ -OOCCH <sub>3</sub> ) <sub>4</sub> (OH <sub>2</sub> ) <sub>8</sub> ]Cl <sub>4</sub> ·3H <sub>2</sub> O <sup>8</sup>                                         | 1.940(4)       |               |
| Average                                                                                                                                                                                                       | 1.940(5)       |               |
| <b>{V<sup>III</sup><sub>4</sub>O<sub>2</sub>}</b>                                                                                                                                                             |                |               |

|                                                                                                                                                                                                                                                                                    |          |
|------------------------------------------------------------------------------------------------------------------------------------------------------------------------------------------------------------------------------------------------------------------------------------|----------|
| [{V( $\mu$ -hpnbpda) <sub>2</sub> } { $\mu$ -(C <sub>6</sub> H <sub>5</sub> O) <sub>2</sub> PO <sub>2</sub> } <sub>2</sub> ( $\mu$ -O) <sub>2</sub> ].6CH <sub>3</sub> OH <sup>9</sup><br><b>{V<sup>III</sup><sub>6</sub>(OH)<sub>6</sub>}</b>                                     | 1.897(5) |
| K <sub>2</sub> [V <sub>6</sub> ( $\mu$ <sub>2</sub> -OH) <sub>6</sub> (ox) <sub>6</sub> (Hdatrz) <sub>6</sub> ]Cl <sub>2</sub> ·29.5H <sub>2</sub> O ( <b>3</b> )<br><b>{V<sup>III</sup><sub>8</sub>(OH)<sub>8</sub>}</b>                                                          | 1.936(2) |
| [V <sub>8</sub> ( $\mu$ <sub>2</sub> -OH) <sub>8</sub> (SO <sub>3</sub> ) <sub>8</sub> (Hdatrz) <sub>8</sub> ]·38H <sub>2</sub> O ( <b>4</b> )                                                                                                                                     | 1.965(4) |
| D-[H <sub>2</sub> N(CH <sub>3</sub> ) <sub>2</sub> ] <sub>12.5</sub> (H <sub>3</sub> N(CH <sub>2</sub> ) <sub>2</sub> NH <sub>3</sub> )(H <sub>3</sub> O) <sub>1.5</sub> (V $\mu$ <sub>2</sub> -OH) <sub>8</sub> (SO <sub>4</sub> ) <sub>16</sub> ·2H <sub>2</sub> O <sup>10</sup> | 1.957(3) |
| L-[H <sub>2</sub> N(CH <sub>3</sub> ) <sub>2</sub> ] <sub>12.5</sub> (H <sub>3</sub> N(CH <sub>2</sub> ) <sub>2</sub> NH <sub>3</sub> )(H <sub>3</sub> O) <sub>1.5</sub> (V $\mu$ <sub>2</sub> -OH) <sub>8</sub> (SO <sub>4</sub> ) <sub>16</sub> ·2H <sub>2</sub> O <sup>10</sup> | 1.966(5) |
| [(CH <sub>3</sub> ) <sub>2</sub> NH <sub>2</sub> ] <sub>17.4</sub> [V <sub>8</sub> ( $\mu$ <sub>2</sub> -OH) <sub>8</sub> ( $\mu$ <sub>2</sub> -SO <sub>4</sub> ) <sub>16</sub> ][SO <sub>4</sub> ] <sub>0.7</sub> <sup>11</sup>                                                   | 1.949(2) |
| [V <sub>8</sub> ( $\mu$ -OH) <sub>4</sub> ( $\mu$ -OEt) <sub>8</sub> ( $\mu$ -CH <sub>3</sub> COO) <sub>12</sub> ] <sup>12</sup>                                                                                                                                                   | 1.967(7) |
| Average                                                                                                                                                                                                                                                                            | 1.961(7) |

---

Table S5. Bond valence sum calculations for  $(\text{NH}_4)_2\text{K}_2[\text{V}_4(\mu_2\text{-OH})_4(\text{ox})_4(\text{pz})_4]\cdot 9\text{H}_2\text{O}$  (**1**),  $(\text{NH}_4)_2\text{Na}_2[\text{V}_4(\mu_2\text{-OH})_4(\text{ox})_4(4\text{-mpz})_4]\cdot 7\text{H}_2\text{O}$  (**2**),  $\text{K}_2[\text{V}_6(\mu_2\text{-OH})_6(\text{ox})_6(\text{Hdatrz})_6]\text{Cl}_2\cdot 29.5\text{H}_2\text{O}$  (**3**) and  $[\text{V}_8(\mu_2\text{-OH})_8(\text{SO}_3)_8(\text{Hdatrz})_8]\cdot 38\text{H}_2\text{O}$  (**4**), respectively.

| Complexes | Atoms          | n        | s            | d            | Assignment          |
|-----------|----------------|----------|--------------|--------------|---------------------|
| <b>1</b>  | V(1)           | 3        | 2.986        | 0.014        |                     |
|           | V(2)           | 3        | 2.982        | 0.018        |                     |
|           | V(3)           | 3        | 3.017        | 0.017        |                     |
|           | <b>average</b> | <b>3</b> | <b>2.995</b> | <b>0.005</b> | <b>V(III)</b>       |
|           | O(5)           | 1        | 1.194        | 0.194        | $\mu_2\text{-OH}^-$ |
|           | O(6)           | 1        | 1.170        | 0.170        | $\mu_2\text{-OH}^-$ |
| <b>2</b>  | V(1)           | 3        | 2.994        | 0.006        |                     |
|           | V(2)           | 3        | 2.937        | 0.063        |                     |
|           | <b>average</b> | <b>3</b> | <b>2.966</b> | <b>0.034</b> | <b>V(III)</b>       |
|           | O(5)           | 1        | 1.184        | 0.184        | $\mu_2\text{-OH}^-$ |
|           | O(10)          | 1        | 1.149        | 0.149        | $\mu_2\text{-OH}^-$ |
| <b>3</b>  | V(1)           | <b>3</b> | <b>3.025</b> | <b>0.025</b> | <b>V(III)</b>       |
|           | O(5)           | 1        | 1.208        | 0.208        | $\mu_2\text{-OH}^-$ |
| <b>4</b>  | V(1)           | 3        | 3.015        | 0.015        |                     |
|           | V(2)           | 3        | 2.941        | 0.059        |                     |
|           | <b>average</b> | <b>3</b> | <b>2.978</b> | <b>0.022</b> | <b>V(III)</b>       |
|           | O(3)           | 1        | 1.151        | 0.151        | $\mu_2\text{-OH}^-$ |
|           | O(4)           | 1        | 1.083        | 0.083        | $\mu_2\text{-OH}^-$ |



Table S6. Comparisons of CO<sub>2</sub> adsorption data for **1**, **2** and **4** with other porous polyoxometalates at 298 K.

| Adsorbents                                                                                                                                                               | Amount<br>(mmol·g <sup>-1</sup> ) | Pressure (bar) |
|--------------------------------------------------------------------------------------------------------------------------------------------------------------------------|-----------------------------------|----------------|
| <b>1</b>                                                                                                                                                                 | 0.006                             | 1              |
| <b>2</b>                                                                                                                                                                 | 0.053                             | 1              |
| <b>4</b>                                                                                                                                                                 | 0.089                             | 1              |
|                                                                                                                                                                          | 1.080                             | 30             |
| [Mo <sup>V</sup> <sub>8</sub> O <sub>8</sub> (μ <sub>2</sub> -O) <sub>12</sub> (Htrz) <sub>8</sub> ]·62H <sub>2</sub> O <sup>13</sup>                                    | 0.052                             | 1              |
| Na <sub>3</sub> [Mo <sup>V</sup> <sub>6</sub> O <sub>6</sub> (μ <sub>2</sub> -O) <sub>9</sub> (Htrz) <sub>3</sub> (trz) <sub>3</sub> ]·7.5H <sub>2</sub> O <sup>14</sup> | 0.020                             | 1              |
| COMOC-2 <sup>15</sup>                                                                                                                                                    | 1.230                             | 1              |
| SO <sub>2</sub> -COMOC-2 <sup>15</sup>                                                                                                                                   | 2.130                             | 1              |
| MFM-300(V <sup>III</sup> ) <sup>16</sup>                                                                                                                                 | 6.000                             | 1              |
| MFM-300(V <sup>IV</sup> ) <sup>16</sup>                                                                                                                                  | 3.540                             | 1              |
| NH <sub>2</sub> -MIL-47 <sup>17</sup>                                                                                                                                    | 5.800                             | 29             |
| V-MIL-100 <sup>18</sup>                                                                                                                                                  | 14.2                              | 1              |

Abbreviations: Htrz = 1H-1,2,3-triazole; SO<sub>2</sub>-COMOC-2 = [V<sup>III</sup>(O)V<sup>IV</sup>(OH)(C<sub>14</sub>H<sub>6</sub>SO<sub>6</sub>)<sub>2</sub>]-  
(DMF)<sub>0.3</sub>(H<sub>2</sub>O)<sub>0.7</sub>(CH<sub>3</sub>OH)<sub>1.15</sub>; MFM-300(V<sup>III</sup>) = V<sup>III</sup><sub>2</sub>(OH)<sub>2</sub>(biphenyl-3,3',5,5'-  
tetracarboxylate); MFM-300(V<sup>IV</sup>) = V<sup>IV</sup><sub>2</sub>O<sub>2</sub>(biphenyl-3,3',5,5'-tetracarboxylate).

Table S7. V- $\mu_2$ -O distances ( $\text{\AA}$ ) for  $(\text{NH}_4)_2\text{K}_2[\text{V}_4(\mu_2\text{-OH})_4(\text{ox})_4(\text{pz})_4]\cdot 9\text{H}_2\text{O}$  (**1**),  $(\text{NH}_4)_2\text{Na}_2[\text{V}_4(\mu_2\text{-OH})_4(\text{ox})_4(4\text{-mpz})_4]\cdot 7\text{H}_2\text{O}$  (**2**) and  $[\text{V}_8(\mu_2\text{-OH})_8(\text{SO}_3)_8(\text{Hdatrz})_8]\cdot 38\text{H}_2\text{O}$  (**4**) before and after  $\text{O}_2$  adsorption.

| Before $\text{O}_2$ adsorption |        |          | After $\text{O}_2$ adsorption |        |          |
|--------------------------------|--------|----------|-------------------------------|--------|----------|
| <b>1</b>                       | V1-O5  | 1.948(4) | <b>1</b>                      | V1-O5  | 1.940(5) |
|                                | V1-O6  | 1.934(4) |                               | V1-O6  | 1.932(5) |
|                                | V2-O6  | 1.946(4) |                               | V2-O6  | 1.947(5) |
|                                | V3-O5  | 1.947(4) |                               | V3-O5  | 1.949(5) |
| <b>2</b>                       | V1-O5  | 1.931(6) | <b>2</b>                      | V1-O5  | 1.926(2) |
|                                | V2-O5  | 1.955(6) |                               | V2-O5  | 1.949(2) |
|                                | V2-O10 | 1.955(6) |                               | V2-O10 | 1.941(2) |
| <b>4</b>                       | V1-O1  | 1.944(4) | <b>4</b>                      | V1-O1  | 1.939(4) |
|                                | V1-O2  | 1.969(4) |                               | V1-O2  | 1.951(4) |
|                                | V2-O2  | 1.983(4) |                               | V2-O2  | 1.980(4) |

## References

1. V. Paredes-García, S. Gaune, M. Saldías, M. T. Garland, R. Baggio, A. Vega, M. S. El Fallah, A. Escuer, E. L. Fur, D. Venegas-Yazigi and E. Spodine, *Inorg. Chim. Acta.*, 2008, **361**, 3681–3689.
2. D. Xiao, Y. Hou, E. Wang, J. Lü, Y. Li, L. Xu and C. Hu, *Inorg. Chem. Commun.*, 2004, **7**, 437–439.
3. P. Schwendt, A. S. Tracey, J. Tatiarsky, J. Gálíková and Z. Žák, *Inorg. Chem.*, 2007, **46**, 3971–3983.
4. D. Wulff-Molder and M. Meisel, *Acta Cryst. C*, 2000, **56**, 33–34.
5. B. Huang, M. Cheng, J. Cai, B. Wu, W. Xiong, X. Hu, Z. Xiao and P. Wu, *J. Chem. Crystallogr.*, 2017, **47**, 95–100.
6. F. Bottomley, J. Darkwa, L. Sutin and P. S. White, *Organometallics*, 1986, **5**, 2165–2171.
7. F. H. Fry, B. A. Dougan, N. McCann, C. J. Ziegler and N. E. Brasch, *Inorg. Chem.*, 2005, **44**, 5197–5199.
8. R. Mukherjee, B. A. Dougan, F. H. Fry, S. D. Bunge, C. J. Ziegler and N. E. Brasch, *Inorg. Chem.*, 2007, **46**, 1575–1585.
9. K. Sato, T. Ohnuki, H. Takahashi, Y. Miyashita, K. Nozaki and K. Kanamori, *Inorg. Chem.*, 2012, **51**, 5026–5036.
10. J. P. Cao, Y. S. Xue, Z. B. Hu, X. M. Luo, C. H. Cui, Y. Song and Y. Xu, *Inorg. Chem.*, 2019, **58**, 2645–2651.
11. M. G. Sorolla, X. Q. Wang, T. Makarenko and A. J. Jacobson, *Chem. Commun.*, 2019, **55**, 342–344.
12. R. H. Laye, M. Murrie, S. Ochsenbein, A. R. Bell, S. J. Teat, J. Raftery, H. U. Gudel and E. J. L. McInnes, *Chem. Eur. J.*, 2003, **9**, 6215–6220.
13. L. Deng, R. Y. Lin and Z. H. Zhou, *Dalton Trans.*, 2022, **51**, 5239–5249.
14. L. Deng, X. Dong and Z. H. Zhou, *Chem. Eur. J.*, 2021, **27**, 9643–9653.
15. G. Wang, K. Leus, S. Couck, P. Tack, H. Depauw, Y. Y. Liu, L. Vincze, J. F. M. Denayer and P. Van Der Voort, *Dalton Trans.*, 2016, **45**, 9485–9491.
16. Z. Z. Lu, H. G. W. Godfrey, I. da Silva, Y. Q. Cheng, M. Savage, F. Tuna, E. J. L. McInnes, S. J. Teat, K. J. Gagnon, M. D. Frogley, P. Manuel, S. Rudic, A. J. Ramirez-Cuesta, T. L. Easun, S. H. Yang and M. Schroder, *Nat. Commun.*, 2017, **8**, 14212.
17. K. Leus, S. Couck, M. Vandichel, G. Vanhaelewyn, Y. Y. Liu, G. B. Marin, I. Van Driessche, D. Depla, M. Waroquier, V. Van Speybroeck, J. F. M. Denayer and P. Van Der Voort, *Phys. Chem. Chem. Phys.*, 2012, **14**, 15562–15570.
18. A. Lieb, H. Leclerc, T. Devic, C. Serre, I. Margiolaki, F. Mahjoubi, J. S. Lee, A. Vimont, M. Daturi and J. S. Chang, *Micropor. Mesopor. Mater.*, 2012, **157**, 18–23.
